# Supplementary material for: Synergistic Cytoprotective Effects of Rutin and Ascorbic Acid on the Proteomic Profile of 3D-Cultured Keratinocytes Exposed to UVA or UVB Radiation
Source: PubMed Central journal article supplement (PMC6893536; doi:10.3390/nu11112672), 2019-11-05
Supplement: nutrients-11-02672-s001.pdf [file nutrients-11-02672-s001.pdf]

Supplementary table 1. The list of proteins with at least 2 unique peptides identified in 3D cultured keratinocytes exposed to UVA (30 J/cm<sup>2</sup>) or UVB irradiation (60 mJ/cm<sup>2</sup>) and treated with treated with rutin [25 µM] or/and ascorbic acid [100 µM].

| Nr | Accession  | Description                                                            |
|----|------------|------------------------------------------------------------------------|
| 1  | A0A024QZN4 | Vinculin                                                               |
| 2  | A0A024QZN9 | Voltage-dependent anion channel 2                                      |
| 3  | A0A024QZV0 | HCG1811539                                                             |
| 4  | A0A024QZX3 | Serpin peptidase inhibitor                                             |
| 5  | A0A024QZZ7 | Histone H2B                                                            |
| 6  | A0A024R1A3 | Ubiquitin-activating enzyme E1                                         |
| 7  | A0A024R1K7 | Tyrosine 3-monooxygenase/tryptophan 5-monooxygenase activation protein |
| 8  | A0A024R280 | Phosphoserine aminotransferase 1                                       |
| 9  | A0A024R2Q4 | Ribosomal protein L15                                                  |
| 10 | A0A024R321 | Filamin B                                                              |
| 11 | A0A024R382 | CNDP dipeptidase 2                                                     |
| 12 | A0A024R3V9 | HCG37498                                                               |
| 13 | A0A024R3X7 | Heat shock 10kDa protein 1 (Chaperonin 10)                             |
| 14 | A0A024R408 | Actin related protein 2/3 complex, subunit 2,                          |
| 15 | A0A024R4U3 | Tubulin tyrosine ligase-like family                                    |
| 16 | A0A024R592 | Glucosidase                                                            |
| 17 | A0A024R5Z8 | RAB11A, member RAS oncogene family                                     |
| 18 | A0A024R652 | Methylenetetrahydrofolate dehydrogenase                                |
| 19 | A0A024R6C9 | Dihydrolipoamide S-succinyltransferase                                 |
| 20 | A0A024R6D4 | Enhancer of rudimentary homolog                                        |
| 21 | A0A024R7F7 | Transportin 2                                                          |
| 22 | A0A024R7T3 | Heterogeneous nuclear ribonucleoprotein F                              |
| 23 | A0A024R814 | Ribosomal protein L7                                                   |
| 24 | A0A024R872 | Chromosome 9 open reading frame 88                                     |
| 25 | A0A024R895 | SET translocation                                                      |
| 26 | A0A024R8W0 | DEAD (Asp-Glu-Ala-Asp) box polypeptide 48                              |
| 27 | A0A024R9E2 | Poly(A) binding protein, cytoplasmic 1                                 |
| 28 | A0A024RA28 | Heterogeneous nuclear ribonucleoprotein A2/B1                          |
| 29 | A0A024RA52 | Proteasome subunit alpha                                               |
| 30 | A0A024RAE4 | Cell division cycle 42                                                 |
| 31 | A0A024RAM0 | Transportin 1                                                          |
| 32 | A0A024RAM2 | Glutaredoxin (Thioltransferase)                                        |
| 33 | A0A024RB41 | HCG2016482                                                             |
| 34 | A0A024RB85 | Proliferation-associated 2G4                                           |
| 35 | A0A024RBH2 | Cytoskeleton-associated protein 4                                      |
| 36 | A0A024RBK9 | Thioredoxin reductase 1                                                |
| 37 | A0A024RC46 | HCG2020860                                                             |
| 38 | A0A024RC76 | Interferon stimulated exonuclease gene 20kDa                           |
| 39 | A0A024RC87 | Ribonuclease/angiogenin inhibitor 1                                    |

|    |            |                                                      |
|----|------------|------------------------------------------------------|
| 40 | A0A024RCN6 | Valyl-tRNA synthetase                                |
| 41 | A0A024RD93 | Phosphoribosylaminoimidazole carboxylase             |
| 42 | A0A024RDH6 | SEC31-like 1                                         |
| 43 | A0A024RDQ0 | Heat shock 105kDa/110kDa protein 1                   |
| 44 | A0A075B6E2 | 40S ribosomal protein S19                            |
| 45 | A0A075B7A0 | Ribosomal protein L5                                 |
| 46 | A0A087WTP3 | Far upstream element-binding protein 2               |
| 47 | A0A087WUV8 | Basigin                                              |
| 48 | A0A087WUZ3 | Spectrin beta chain, non-erythrocytic 1              |
| 49 | A0A087WVQ9 | Elongation factor 1-alpha 1                          |
| 50 | A0A087WW66 | 26S proteasome non-ATPase regulatory subunit 1       |
| 51 | A0A087WX41 | Clathrin heavy chain 2                               |
| 52 | A0A087WYC1 | Heat shock 70 kDa protein 4                          |
| 53 | A0A087WYG8 | Alpha-internexin                                     |
| 54 | A0A087WYS1 | UTP--glucose-1-phosphate uridylyltransferase         |
| 55 | A0A087WZ27 | Zinc finger protein 90                               |
| 56 | A0A087X0X3 | Heterogeneous nuclear ribonucleoprotein M            |
| 57 | A0A087X1N8 | Serpin B6                                            |
| 58 | A0A087X1Z3 | Proteasome activator complex subunit                 |
| 59 | A0A087X253 | AP-2 complex subunit beta                            |
| 60 | A0A087X2E9 | Glutathione S-transferase P                          |
| 61 | A0A090N8G0 | Glycyl-tRNA synthetase                               |
| 62 | A0A0A0MSA7 | Eukaryotic translation initiation factor 4 gamma 3   |
| 63 | A0A0A0MSI0 | Peroxiredoxin 1                                      |
| 64 | A0A0A0MSS8 | Aldo-keto reductase family 1 member C3               |
| 65 | A0A0A0MTN3 | Glutathione S-transferase Mu                         |
| 66 | A0A0A0U6N4 | NADP+-soluble isocitrate dehydrogenase 1             |
| 67 | A0A0A6YYG9 | Protein ARPC4-TTLL3                                  |
| 68 | A0A0B4J207 | Ribose-phosphate pyrophosphokinase 3                 |
| 69 | A0A0C4DFS8 | Nicotinamide phosphoribosyltransferase               |
| 70 | A0A0C4DFV9 | Protein SET                                          |
| 71 | A0A0C4DG17 | 40S ribosomal protein SA                             |
| 72 | A0A0C4DGH5 | Cullin-associated NEDD8-dissociated protein 1        |
| 73 | A0A0D9SFB3 | ATP-dependent RNA helicase DDX3X                     |
| 74 | A0A0D9SFF6 | Spectrin alpha chain, non-erythrocytic 1             |
| 75 | A0A0G2JJZ9 | Spliceosome RNA helicase DDX39B                      |
| 76 | A0A0K0K1H9 | Epididymis secretory protein Li 48                   |
| 77 | A0A0K0K1I0 | Epididymis secretory protein Li 265                  |
| 78 | A0A0S2Z3C0 | Actinin alpha 4 isoform 3                            |
| 79 | A0A0S2Z3W2 | Fumarate hydratase isoform 6                         |
| 80 | A0A0S2Z3X3 | Actinin alpha 4 isoform 2                            |
| 81 | A0A0S2Z3X6 | Fumarate hydratase isoform 4                         |
| 82 | A0A0S2Z3Y1 | Lectin galactoside-binding soluble 3 binding protein |
| 83 | A0A0S2Z415 | Heat shock 60kDa protein 1                           |
| 84 | A0A0S2Z428 | HCG2039812                                           |

|     |            |                                                     |
|-----|------------|-----------------------------------------------------|
| 85  | A0A0S2Z434 | Hydroxysteroid dehydrogenase 10                     |
| 86  | A0A0S2Z471 | Creatine kinase brain isoform 2                     |
| 87  | A0A0S2Z4G4 | Tropomyosin 3 isoform 1                             |
| 88  | A0A0S2Z4G8 | Tropomyosin 3 isoform 2                             |
| 89  | A0A0S2Z4H0 | Fumarate hydratase isoform 5                        |
| 90  | A0A0S2Z4I4 | Tropomyosin 3 isoform 3                             |
| 91  | A0A0S2Z4J7 | Glutathione synthetase isoform 2                    |
| 92  | A0A0S2Z5K8 | Spermatid perinuclear RNA binding protein isoform 2 |
| 93  | A0A0U1RQF0 | Fatty acid synthase                                 |
| 94  | A0AUL6     | ACTB protein                                        |
| 95  | A0JLQ5     | BXDC2 protein                                       |
| 96  | A0PJ87     | RSL1D1 protein                                      |
| 97  | A1JUI8     | Chaperonin subunit 6A                               |
| 98  | A1L0V1     | ACTN1 protein                                       |
| 99  | A1XP52     | Catecholamine-regulated protein 40                  |
| 100 | A2IDB2     | 14-3-3 protein eta                                  |
| 101 | A3R0T8     | Histone 1                                           |
| 102 | A4D2P0     | Ras-related C3 botulinum toxin substrate 1          |
| 103 | A4FU77     | SNRNP200 protein                                    |
| 104 | A4FU99     | CLTCL1 protein                                      |
| 105 | A4QMW8     | ENO1 protein                                        |
| 106 | A4QPB0     | IQ motif containing GTPase activating protein 1     |
| 107 | A4UCS5     | Peroxiredoxin 3                                     |
| 108 | A4UCS6     | Peroxiredoxin 6                                     |
| 109 | A4UCS8     | Enolase 1                                           |
| 110 | A4UCT3     | Beta-actin                                          |
| 111 | A4UCU2     | Beta-4 tubulin                                      |
| 112 | A4ZU86     | Truncated nucleolar phosphoprotein B23              |
| 113 | A5D904     | RPS9 protein                                        |
| 114 | A5YM63     | NEFM protein                                        |
| 115 | A6NIW5     | Peroxiredoxin 2                                     |
| 116 | A6NJA2     | Ubiquitin carboxyl-terminal hydrolase 14            |
| 117 | A6NLN1     | Polypyrimidine tract binding protein 1              |
| 118 | A6XGP7     | Reticulon                                           |
| 119 | A7E2S3     | RPS3 protein                                        |
| 120 | A7XZE4     | Beta tropomyosin                                    |
| 121 | A8K168     | Malic enzyme                                        |
| 122 | A8K7Q2     | Heat shock cognate 71 kDa protein                   |
| 123 | A8K7T0     | Kynureninase                                        |
| 124 | A8K8N7     | Phosphoribosylformylglycinamide synthase            |
| 125 | A9X7H1     | Eukaryotic translation elongation factor 1 alpha    |
| 126 | B0YJC4     | Vimentin                                            |
| 127 | B1AHC9     | X-ray repair cross-complementing protein 6          |
| 128 | B1AP13     | Complement decay-accelerating factor                |
| 129 | B1AP15     | CD55 antigen                                        |

|     |        |                                                          |
|-----|--------|----------------------------------------------------------|
| 130 | B1AQP8 | Epoxide hydrolase 1                                      |
| 131 | B2MV14 | Truncated lactoferrin                                    |
| 132 | B2R4D8 | 60S ribosomal protein L27                                |
| 133 | B2RPK0 | Putative high mobility group protein B1                  |
| 134 | B2RU10 | EIF4G1 protein                                           |
| 135 | B2RXH8 | Heterogeneous nuclear ribonucleoprotein C-like 2         |
| 136 | B2ZZ89 | Epididymis luminal protein 102                           |
| 137 | B3KRS7 | RuvB-like helicase                                       |
| 138 | B3KS31 | Tubulin, beta 6                                          |
| 139 | B3KWE1 | Histidine--tRNA ligase, cytoplasmic                      |
| 140 | B4DID5 | Transaldolase 1                                          |
| 141 | B4DJV2 | Citrate synthase                                         |
| 142 | B4DK69 | Aldo-keto reductase family 1 member C2                   |
| 143 | B4DLV8 | Ribosomal protein L9                                     |
| 144 | B4DMJ7 | HCG2015269                                               |
| 145 | B4DP52 | HCG2005638                                               |
| 146 | B4DT28 | Heterogeneous nuclear ribonucleoprotein R                |
| 147 | B4DUR8 | T-complex protein 1 subunit gamma                        |
| 148 | B4DVZ8 | Leukotriene A(4) hydrolase                               |
| 149 | B4DXW1 | Actin-related protein 3                                  |
| 150 | B4E0E1 | Poly [ADP-ribose] polymerase                             |
| 151 | B5BU24 | 14-3-3 protein beta/alpha                                |
| 152 | B5BU25 | U2 small nuclear RNA auxiliary factor 2                  |
| 153 | B5BUE6 | ATP-dependent RNA helicase DDX5                          |
| 154 | B5MCE7 | Basic leucine zipper and W2 domain-containing protein 2  |
| 155 | B5MCP9 | 40S ribosomal protein S7                                 |
| 156 | B5MCT8 | 40S ribosomal protein S9                                 |
| 157 | B5MDF5 | GTP-binding nuclear protein Ran                          |
| 158 | B7Z268 | Single-stranded DNA binding protein 1                    |
| 159 | B7Z2E6 | 14-3-3 protein zeta/delta                                |
| 160 | B7Z4E3 | 60S ribosomal protein L31                                |
| 161 | B7Z645 | Heterogeneous nuclear ribonucleoprotein Q                |
| 162 | B7ZB02 | Ribose-phosphate pyrophosphokinase 1                     |
| 163 | B8Y0L3 | Aspartate beta-hydroxylase                               |
| 164 | B8ZZ38 | Leucine-rich PPR motif-containing protein, mitochondrial |
| 165 | B8ZZL8 | 10 kDa heat shock protein, mitochondrial                 |
| 166 | B9EKV4 | Aldehyde dehydrogenase 9 family, member A1               |
| 167 | C9J0D1 | Histone H2A                                              |
| 168 | C9J4N6 | Isocitrate dehydrogenase [NADP] cytoplasmic              |
| 169 | C9J712 | Profilin-2                                               |
| 170 | C9J8F3 | Fructose-bisphosphate aldolase C                         |
| 171 | C9J9C1 | Serine/threonine-protein phosphatase 2A                  |
| 172 | C9JFN4 | Basic leucine zipper and W2 domain-containing protein 1  |
| 173 | C9JFR7 | Cytochrome c                                             |
| 174 | C9JMZ3 | Aminopeptidase B                                         |

|     |        |                                                       |
|-----|--------|-------------------------------------------------------|
| 175 | C9JRZ8 | Aldo-keto reductase family 1 member B15               |
| 176 | C9JUP7 | Transitional endoplasmic reticulum ATPase             |
| 177 | C9JZG2 | Trifunctional purine biosynthetic protein adenosine-3 |
| 178 | C9K025 | 60S ribosomal protein L35a                            |
| 179 | C9K0U8 | Single-stranded DNA-binding protein, mitochondrial    |
| 180 | D3DN77 | HCG2022736                                            |
| 181 | D3DP78 | Aspartyl-tRNA synthetase                              |
| 182 | D3DPI2 | HCG1641229                                            |
| 183 | D3DQY9 | HCG1991922                                            |
| 184 | D3DS95 | HCG21173                                              |
| 185 | D3DTL4 | Enolase 3                                             |
| 186 | D3DUG9 | Ubiquitin specific peptidase 14                       |
| 187 | D3DWK1 | Eukaryotic translation elongation factor 1 delta      |
| 188 | D6R9B6 | 40S ribosomal protein S3a                             |
| 189 | D6R9P3 | Heterogeneous nuclear ribonucleoprotein A/B           |
| 190 | D6RA11 | Ubiquitin-conjugating enzyme E2                       |
| 191 | D6RBW1 | Eukaryotic translation initiation factor 4E           |
| 192 | D6RC06 | Histidine triad nucleotide-binding protein 1          |
| 193 | D6RCN3 | Annexin A5                                            |
| 194 | D6REM6 | Matrin-3                                              |
| 195 | D6RF62 | Multifunctional protein ADE2                          |
| 196 | D6W507 | HCG1990625                                            |
| 197 | D6W5E6 | UDP-glucose pyrophosphorylase 2                       |
| 198 | D9IAI1 | Epididymis secretory protein Li 34                    |
| 199 | D9YZV4 | Tropomyosin 1                                         |
| 200 | E2DRY6 | C-myc promoter-binding protein 1                      |
| 201 | E4W6B6 | RPL27/NME2 fusion protein                             |
| 202 | E5RI06 | Glutathione reductase, mitochondrial                  |
| 203 | E5RJH3 | 60S ribosomal protein L30                             |
| 204 | E7ENZ3 | T-complex protein 1 subunit epsilon                   |
| 205 | E7EPB3 | 60S ribosomal protein L14                             |
| 206 | E7EQR6 | T-complex protein 1 subunit $\alpha$                  |
| 207 | E7ER44 | Lactotransferrin                                      |
| 208 | E7ESE0 | 60S ribosomal protein L9                              |
| 209 | E7ET17 | Peroxisomal multifunctional enzyme type 2             |
| 210 | E7ETK0 | 40S ribosomal protein S24                             |
| 211 | E7EX73 | Eukaryotic translation initiation factor 4 gamma 1    |
| 212 | E7EXB4 | 60 kDa heat shock protein, mitochondrial              |
| 213 | E9PCX2 | Aldose reductase                                      |
| 214 | E9PCY7 | Heterogeneous nuclear ribonucleoprotein H             |
| 215 | E9PEB5 | Far upstream element-binding protein 1                |
| 216 | E9PEX6 | Dihydrolipoyl dehydrogenase                           |
| 217 | E9PF18 | Hydroxyacyl-coenzyme A dehydrogenase, mitochondrial   |
| 218 | E9PFG7 | 2-oxoglutarate dehydrogenase, mitochondrial           |
| 219 | E9PG15 | 14-3-3 protein theta                                  |

|     |        |                                                               |
|-----|--------|---------------------------------------------------------------|
| 220 | E9PGM4 | 1,4-alpha-glucan-branching enzyme                             |
| 221 | E9PGT1 | Translin                                                      |
| 222 | E9PK47 | Alpha-1,4 glucan phosphorylase                                |
| 223 | E9PKZ0 | 60S ribosomal protein L8                                      |
| 224 | E9PLK3 | Puromycin-sensitive aminopeptidase                            |
| 225 | E9PM13 | Heat shock cognate 71 kDa protein                             |
| 226 | E9PM36 | 40S ribosomal protein S2                                      |
| 227 | E9PM69 | 26S protease regulatory subunit 6A                            |
| 228 | E9PMA9 | Ribonuclease inhibitor                                        |
| 229 | E9PP73 | Coatomer subunit beta                                         |
| 230 | E9PPH5 | Acidic leucine-rich nuclear phosphoprotein 32 family member E |
| 231 | E9PQ63 | Carbonyl reductase [NADPH] 1                                  |
| 232 | E9PRY8 | Elongation factor 1-delta                                     |
| 233 | E9PSF4 | 40S ribosomal protein S3                                      |
| 234 | F1T0B3 | ATP-dependent RNA helicase DDX1                               |
| 235 | F4ZW62 | NF45                                                          |
| 236 | F4ZW64 | NF90a                                                         |
| 237 | F4ZW66 | NF110b                                                        |
| 238 | F5GXD8 | Stress-induced-phosphoprotein 1                               |
| 239 | F5GZS6 | 4F2 cell-surface antigen heavy chain                          |
| 240 | F5H0C8 | Gamma-enolase                                                 |
| 241 | F5H2F4 | C-1-tetrahydrofolate synthase, cytoplasmic                    |
| 242 | F5H365 | Protein transport protein Sec23A                              |
| 243 | F5H6X6 | Neutral alpha-glucosidase AB                                  |
| 244 | F5H8H6 | L-lactate dehydrogenase                                       |
| 245 | F6TLX2 | Glyoxalase domain-containing protein 3                        |
| 246 | F6XY72 | HCG2001850                                                    |
| 247 | F8VPD4 | CAD protein                                                   |
| 248 | F8VQ14 | T-complex protein 1 subunit beta                              |
| 249 | F8VS02 | Alpha-amino adipic semialdehyde dehydrogenase                 |
| 250 | F8VU65 | 60S acidic ribosomal protein P0                               |
| 251 | F8VX68 | Citrate synthase, mitochondrial                               |
| 252 | F8VY02 | Endoplasmic reticulum resident protein 29                     |
| 253 | F8VYV2 | 60S ribosomal protein L18                                     |
| 254 | F8VZ45 | 60S ribosomal protein L6                                      |
| 255 | F8W1N5 | Nascent polypeptide-associated complex                        |
| 256 | F8W727 | 60S ribosomal protein L32                                     |
| 257 | F8WD96 | Cathepsin D                                                   |
| 258 | G3V1A4 | Cofilin 1 (Non-muscle)                                        |
| 259 | G3V1B3 | 60S ribosomal protein L21                                     |
| 260 | G3V1C3 | Apoptosis inhibitor 5                                         |
| 261 | G3V203 | Ribosomal protein S2                                          |
| 262 | G3V213 | Adenylate kinase 2                                            |
| 263 | G3V2J8 | Heat shock protein HSP 90-alpha                               |
| 264 | G3V576 | Heterogeneous nuclear ribonucleoproteins C1/C2                |

|     |        |                                                               |
|-----|--------|---------------------------------------------------------------|
| 265 | G3V5B3 | ERO1-like protein alpha                                       |
| 266 | G3V5L0 | Serine hydroxymethyltransferase, mitochondrial                |
| 267 | G3V5Q1 | DNA-(apurinic or apyrimidinic site) lyase                     |
| 268 | G3XAL0 | Malate dehydrogenase                                          |
| 269 | G5E9G0 | 60S ribosomal protein L3                                      |
| 270 | G5E9R0 | Actin, cytoplasmic 1                                          |
| 271 | G5E9S2 | Hydroxysteroid (17-beta) dehydrogenase 4                      |
| 272 | G9K388 | YWHAE/FAM22A fusion protein                                   |
| 273 | H0UID5 | AP complex subunit beta                                       |
| 274 | H0Y426 | Valine--tRNA ligase                                           |
| 275 | H0Y4R1 | Inosine-5'-monophosphate dehydrogenase 2                      |
| 276 | H0YDZ7 | Guanine deaminase                                             |
| 277 | H0YFD6 | Trifunctional enzyme subunit alpha, mitochondrial             |
| 278 | H0YHA7 | Ribosomal protein L10                                         |
| 279 | H0YIZ0 | Serine hydroxymethyltransferase                               |
| 280 | H0YJ63 | Activator of 90 kDa heat shock protein ATPase homolog 1       |
| 281 | H0YJC0 | 26S protease regulatory subunit 10B                           |
| 282 | H0YK49 | Electron transfer flavoprotein subunit alpha, mitochondrial   |
| 283 | H0YKD8 | 60S ribosomal protein L28                                     |
| 284 | H0YKN4 | Annexin A2                                                    |
| 285 | H0YL72 | Isocitrate dehydrogenase [NAD] subunit alpha                  |
| 286 | H0YLC7 | Fumarylacetoacetase                                           |
| 287 | H0YLE8 | Ras GTPase-activating-like protein IQGAP1                     |
| 288 | H0YN26 | Acidic leucine-rich nuclear phosphoprotein 32 family member A |
| 289 | H0YN88 | 40S ribosomal protein S17                                     |
| 290 | H3BM89 | 60S ribosomal protein L4                                      |
| 291 | H3BNI9 | Casein kinase II subunit alpha                                |
| 292 | H3BNT7 | 26S proteasome non-ATPase regulatory subunit 7                |
| 293 | H3BQZ9 | Adenine phosphoribosyltransferase                             |
| 294 | H3BRV9 | Nuclear transport factor 2                                    |
| 295 | H3BSC1 | Ras-related protein Rab                                       |
| 296 | H3BU13 | Pyruvate kinase PKM                                           |
| 297 | H6WCP5 | EPRSN1                                                        |
| 298 | H7BZ35 | Aspartate--tRNA ligase, cytoplasmic                           |
| 299 | H7C004 | Serpin B10                                                    |
| 300 | H7C0R3 | Glutamine--tRNA ligase                                        |
| 301 | H7C123 | 60S ribosomal protein L10                                     |
| 302 | H7C1H2 | 26S proteasome non-ATPase regulatory subunit 2                |
| 303 | H7C3F9 | Actin-related protein 2/3 complex subunit 2                   |
| 304 | H7C3T4 | Peroxiredoxin 4                                               |
| 305 | H9ZYJ2 | Thioredoxin                                                   |
| 306 | I3L0A0 | HCG2044781                                                    |
| 307 | I3L239 | Heat shock protein 75 kDa, mitochondrial                      |
| 308 | I3L2R6 | Thioredoxin domain-containing protein 17                      |
| 309 | I3L3P7 | 40S ribosomal protein S15a                                    |

|     |        |                                                            |
|-----|--------|------------------------------------------------------------|
| 310 | I3L3Q4 | Glyoxalase domain-containing protein 4                     |
| 311 | I6L957 | HNRNPA2B1 protein                                          |
| 312 | I6L965 | KRT18 protein                                              |
| 313 | I6TRR8 | SND1-BRAF                                                  |
| 314 | J3JS69 | 40S ribosomal protein S18                                  |
| 315 | J3K000 | PEPD protein                                               |
| 316 | J3KMX5 | 40S ribosomal protein S13                                  |
| 317 | J3KNQ3 | 26S proteasome non-ATPase regulatory subunit 13            |
| 318 | J3KPD9 | Protein NME1-NME2                                          |
| 319 | J3KPE3 | Receptor of-activated protein C kinase 1                   |
| 320 | J3KQ18 | D-dopachrome decarboxylase                                 |
| 321 | J3KQ32 | Obg-like ATPase 1                                          |
| 322 | J3KRD5 | Cytosolic non-specific dipeptidase                         |
| 323 | J3KRY1 | Rho GDP-dissociation inhibitor 1                           |
| 324 | J3KS13 | Clathrin heavy chain 1                                     |
| 325 | J3QR09 | Ribosomal protein L19                                      |
| 326 | J3QR64 | Eukaryotic initiation factor 4A-I                          |
| 327 | J3QTR3 | Ubiquitin-40S ribosomal protein S27a                       |
| 328 | J7M2B1 | Tyrosine-protein kinase receptor                           |
| 329 | K7EJ44 | Profilin 1                                                 |
| 330 | K7EKS7 | 60S ribosomal protein L22                                  |
| 331 | K7ELC2 | 40S ribosomal protein S15                                  |
| 332 | K7ELW0 | Protein deglycase DJ-1                                     |
| 333 | K7EM49 | 6-phosphogluconate dehydrogenase, decarboxylating          |
| 334 | K7ENG2 | Splicing factor U2AF 65 kDa                                |
| 335 | K7EQ48 | Glucose-6-phosphate isomerase                              |
| 336 | K7ER00 | Phenylalanine--tRNA ligase alpha subunit                   |
| 337 | K9MS24 | Beta-spectrin non-erythrocytic 1                           |
| 338 | L0R849 | Alternative protein EDARADD                                |
| 339 | L8B4R0 | Ubiquitin C                                                |
| 340 | M0QZC5 | 40S ribosomal protein S11                                  |
| 341 | M0R0R2 | 40S ribosomal protein S5                                   |
| 342 | M0R192 | Flavin reductase (NADPH)                                   |
| 343 | M0R1A7 | 60S ribosomal protein L18a                                 |
| 344 | M0R1M6 | Ubiquitin-60S ribosomal protein L40                        |
| 345 | M0R210 | 40S ribosomal protein S16                                  |
| 346 | M0R248 | Delta(3,5)-Delta(2,4)-dienoyl-CoA isomerase, mitochondrial |
| 347 | M0R261 | 6-phosphogluconolactonase                                  |
| 348 | O00231 | 26S proteasome non-ATPase regulatory subunit 11            |
| 349 | O00303 | Eukaryotic translation initiation factor 3 subunit F       |
| 350 | O00487 | 26S proteasome non-ATPase regulatory subunit 14            |
| 351 | O14744 | Protein arginine N-methyltransferase 5                     |
| 352 | O14942 | Heat shock protein beta                                    |
| 353 | O14943 | Phosphofructokinase-P                                      |
| 354 | O14980 | Exportin-1                                                 |



|     |        |                                                      |
|-----|--------|------------------------------------------------------|
| 355 | O14992 | HS24/P52                                             |
| 356 | O43143 | Pre-mRNA-splicing factor ATP-dependent RNA helicase  |
| 357 | O43242 | 26S proteasome non-ATPase regulatory subunit 3       |
| 358 | O43707 | Alpha-actinin-4                                      |
| 359 | O60218 | Aldo-keto reductase family 1 member B10              |
| 360 | O60568 | Procollagen-lysine,2-oxoglutarate 5-dioxygenase 3    |
| 361 | O60701 | UDP-glucose 6-dehydrogenase                          |
| 362 | O60812 | Heterogeneous nuclear ribonucleoprotein C-like 1     |
| 363 | O75322 | Hsp89-alpha-delta-N                                  |
| 364 | O75367 | Core histone macro-H2A.1                             |
| 365 | O75533 | Splicing factor 3B subunit 1                         |
| 366 | O75643 | U5 small nuclear ribonucleoprotein 200 kDa helicase  |
| 367 | O75828 | Carbonyl reductase [NADPH] 3                         |
| 368 | O76003 | Glutaredoxin-3                                       |
| 369 | O76021 | Ribosomal L1 domain-containing protein 1             |
| 370 | O95758 | Polypyrimidine tract-binding protein 3               |
| 371 | P00491 | Purine nucleoside phosphorylase                      |
| 372 | P00492 | Hypoxanthine-guanine phosphoribosyltransferase       |
| 373 | P00966 | Argininosuccinate synthase                           |
| 374 | P01375 | TNF $\alpha$                                         |
| 375 | P02765 | Alpha-2-HS-glycoprotein                              |
| 376 | P02771 | Alpha-fetoprotein                                    |
| 377 | P02792 | Ferritin light chain                                 |
| 378 | P02794 | Ferritin heavy chain                                 |
| 379 | P04075 | Fructose-bisphosphate aldolase A                     |
| 380 | P04083 | Annexin A1                                           |
| 381 | P04179 | Superoxide dismutase [Mn], mitochondrial             |
| 382 | P04632 | Calpain small subunit 1                              |
| 383 | P04637 | P53                                                  |
| 384 | P05091 | Aldehyde dehydrogenase, mitochondrial                |
| 385 | P05198 | Eukaryotic translation initiation factor 2 subunit 1 |
| 386 | P06733 | Alpha-enolase                                        |
| 387 | P07954 | Fumarate hydratase, mitochondrial                    |
| 388 | P08238 | Heat shock protein HSP 90-beta                       |
| 389 | P09382 | Galectin-1                                           |
| 390 | P0CG47 | Polyubiquitin-B                                      |
| 391 | P0DMR1 | Heterogeneous nuclear ribonucleoprotein C-like 4     |
| 392 | P0DMV9 | Heat shock 70 kDa protein 1B                         |
| 393 | P10155 | 60 kDa SS-A/Ro ribonucleoprotein                     |
| 394 | P11279 | Lysosome-associated membrane glycoprotein 1          |
| 395 | P11413 | Glucose-6-phosphate 1-dehydrogenase                  |
| 396 | P11908 | Ribose-phosphate pyrophosphokinase 2                 |
| 397 | P11940 | Polyadenylate-binding protein 1                      |
| 398 | P12814 | Alpha-actinin-1                                      |
| 399 | P13010 | X-ray repair cross-complementing protein 5           |

|     |        |                                                                   |
|-----|--------|-------------------------------------------------------------------|
| 400 | P13639 | Elongation factor 2                                               |
| 401 | P13693 | Translationally-controlled tumor protein                          |
| 402 | P13929 | Beta-enolase                                                      |
| 403 | P14324 | Farnesyl pyrophosphate synthase                                   |
| 404 | P14550 | Alcohol dehydrogenase [NADP(+)]                                   |
| 405 | P14625 | Endoplasmin                                                       |
| 406 | P14678 | Small nuclear ribonucleoprotein-associated proteins B             |
| 407 | P14866 | Heterogeneous nuclear ribonucleoprotein L                         |
| 408 | P15170 | Eukaryotic peptide chain release factor GTP-binding subunit ERF3A |
| 409 | P15559 | NAD(P)H dehydrogenase [quinone] 1                                 |
| 410 | P16402 | Histone H1.3                                                      |
| 411 | P16403 | Histone H1.2                                                      |
| 412 | P17066 | Heat shock 70 kDa protein 6                                       |
| 413 | P17655 | Calpain-2 catalytic subunit                                       |
| 414 | P17931 | Galectin-3                                                        |
| 415 | P17987 | T-complex protein 1 subunit alpha                                 |
| 416 | P18124 | 60S ribosomal protein L7                                          |
| 417 | P19338 | Nucleolin                                                         |
| 418 | P19367 | Hexokinase-1                                                      |
| 419 | P19623 | Spermidine synthase                                               |
| 420 | P20073 | Annexin A7                                                        |
| 421 | P21796 | Voltage-dependent anion-selective channel protein                 |
| 422 | P22087 | rRNA 2'-O-methyltransferase fibrillarin                           |
| 423 | P23246 | Splicing factor, proline- and glutamine-rich                      |
| 424 | P23368 | NAD-dependent malic enzyme, mitochondrial                         |
| 425 | P23381 | Tryptophan--tRNA ligase, cytoplasmic                              |
| 426 | P23526 | Adenosylhomocysteinase                                            |
| 427 | P24752 | Acetyl-CoA acetyltransferase, mitochondrial                       |
| 428 | P25398 | 40S ribosomal protein S12                                         |
| 429 | P25799 | NFκB                                                              |
| 430 | P26038 | Moesin                                                            |
| 431 | P26639 | Threonine--tRNA ligase, cytoplasmic                               |
| 432 | P26641 | Elongation factor 1-gamma                                         |
| 433 | P27824 | Calnexin                                                          |
| 434 | P28838 | Cytosol aminopeptidase                                            |
| 435 | P30044 | Peroxiredoxin 5, mitochondrial                                    |
| 436 | P30048 | Thioredoxin-dependent peroxide reductase, mitochondrial           |
| 437 | P30050 | 60S ribosomal protein L12                                         |
| 438 | P30084 | Enoyl-CoA hydratase, mitochondrial                                |
| 439 | P30101 | Protein disulfide-isomerase A                                     |
| 440 | P31150 | Rab GDP dissociation inhibitor                                    |
| 441 | P31939 | Bifunctional purine biosynthesis protein PURH                     |
| 442 | P31947 | 14-3-3 protein sigma                                              |
| 443 | P35270 | Sepiapterin reductase                                             |
| 444 | P35998 | 26S protease regulatory subunit 7                                 |

|     |        |                                                                |
|-----|--------|----------------------------------------------------------------|
| 445 | P36952 | Serpin B5                                                      |
| 446 | P37802 | Transgelin-2                                                   |
| 447 | P38117 | Electron transfer flavoprotein subunit beta                    |
| 448 | P38646 | Stress-70 protein, mitochondrial                               |
| 449 | P39748 | Flap endonuclease 1                                            |
| 450 | P40227 | T-complex protein 1 subunit zeta                               |
| 451 | P41091 | Eukaryotic translation initiation factor 2 subunit 3           |
| 452 | P41250 | Glycine--tRNA ligase                                           |
| 453 | P42574 | Caspase 3                                                      |
| 454 | P43686 | 26S protease regulatory subunit 6B                             |
| 455 | P46783 | 40S ribosomal protein S10                                      |
| 456 | P47756 | F-actin-capping protein subunit beta                           |
| 457 | P48735 | Isocitrate dehydrogenase [NADP], mitochondrial                 |
| 458 | P48741 | Putative heat shock 70 kDa protein 7                           |
| 459 | P49189 | 4-trimethylaminobutyraldehyde dehydrogenase                    |
| 460 | P49411 | Elongation factor Tu, mitochondrial                            |
| 461 | P49588 | Alanine--tRNA ligase, cytoplasmic                              |
| 462 | P49748 | Very long-chain specific acyl-CoA dehydrogenase, mitochondrial |
| 463 | P50990 | T-complex protein 1 subunit theta                              |
| 464 | P50991 | T-complex protein 1 subunit delta                              |
| 465 | P51991 | Heterogeneous nuclear ribonucleoprotein A3                     |
| 466 | P52789 | Hexokinase-2                                                   |
| 467 | P53004 | Biliverdin reductase A                                         |
| 468 | P53396 | ATP-citrate synthase                                           |
| 469 | P53621 | Coatomer subunit alpha                                         |
| 470 | P54136 | Arginine--tRNA ligase, cytoplasmic                             |
| 471 | P54886 | Delta-1-pyrroline-5-carboxylate synthase                       |
| 472 | P55010 | Eukaryotic translation initiation factor 5                     |
| 473 | P55060 | Exportin-2                                                     |
| 474 | P56537 | Eukaryotic translation initiation factor 6                     |
| 475 | P60228 | Eukaryotic translation initiation factor 3 subunit E           |
| 476 | P60866 | 40S ribosomal protein S20                                      |
| 477 | P61204 | ADP-ribosylation factor 3                                      |
| 478 | P61254 | 60S ribosomal protein L26                                      |
| 479 | P61978 | Heterogeneous nuclear ribonucleoprotein K                      |
| 480 | P61981 | 14-3-3 protein gamma                                           |
| 481 | P62136 | Serine/threonine-protein phosphatase PP1                       |
| 482 | P62195 | 26S protease regulatory subunit 8                              |
| 483 | P62258 | 14-3-3 protein epsilon                                         |
| 484 | P62308 | Small nuclear ribonucleoprotein G                              |
| 485 | P62701 | 40S ribosomal protein S4, X isoform                            |
| 486 | P62851 | 40S ribosomal protein S25                                      |
| 487 | P62854 | 40S ribosomal protein S26                                      |
| 488 | P62906 | 60S ribosomal protein L10a                                     |
| 489 | P62913 | 60S ribosomal protein L11                                      |

|     |        |                                                                      |
|-----|--------|----------------------------------------------------------------------|
| 490 | P63162 | Small nuclear ribonucleoprotein-associated protein N                 |
| 491 | P63261 | Actin, cytoplasmic 2                                                 |
| 492 | P68366 | Tubulin alpha-4A                                                     |
| 493 | P68371 | Tubulin beta-4B                                                      |
| 494 | P78527 | DNA-dependent protein kinase catalytic subunit                       |
| 495 | P84077 | ADP-ribosylation factor 1                                            |
| 496 | P84098 | 60S ribosomal protein L19                                            |
| 497 | Q00839 | Heterogeneous nuclear ribonucleoprotein U                            |
| 498 | Q01518 | Adenylyl cyclase-associated protein 1                                |
| 499 | Q01813 | ATP-dependent 6-phosphofructokinase                                  |
| 500 | Q05639 | Elongation factor 1-alpha 2                                          |
| 501 | Q05BS0 | Eukaryotic translation initiation factor 3 subunit A                 |
| 502 | Q05CK9 | SYNCRIP protein                                                      |
| 503 | Q05CV6 | CPS1 protein                                                         |
| 504 | Q05D48 | TNPO2 protein                                                        |
| 505 | Q06210 | Glutamine--fructose-6-phosphate aminotransferase                     |
| 506 | Q07020 | Ribosomal protein S4                                                 |
| 507 | Q07021 | Complement component 1 Q subcomponent-binding protein, mitochondrial |
| 508 | Q08170 | Serine/arginine-rich splicing factor 4                               |
| 509 | Q08211 | ATP-dependent RNA helicase A                                         |
| 510 | Q08AJ6 | ANP32A protein                                                       |
| 511 | Q08ES8 | Cell growth-inhibiting protein 34                                    |
| 512 | Q0D2M2 | HIST1H2BC protein                                                    |
| 513 | Q0EFC9 | TC4 protein                                                          |
| 514 | Q0IIN5 | VCP protein                                                          |
| 515 | Q0IJ56 | ST13 protein                                                         |
| 516 | Q0QER2 | Isocitrate dehydrogenase 1                                           |
| 517 | Q0QEW2 | Ribosomal protein L18                                                |
| 518 | Q0VAS5 | Histone H4                                                           |
| 519 | Q0VGA5 | SARS protein                                                         |
| 520 | Q0VGD6 | HNRPR protein                                                        |
| 521 | Q0VGL3 | RPL13A protein                                                       |
| 522 | Q13041 | P67                                                                  |
| 523 | Q13247 | Serine/arginine-rich splicing factor 6                               |
| 524 | Q13509 | Tubulin beta-3                                                       |
| 525 | Q13748 | Tubulin alpha-3C/D                                                   |
| 526 | Q13867 | Bleomycin hydrolase                                                  |
| 527 | Q13885 | Tubulin beta-2A                                                      |
| 528 | Q14103 | Heterogeneous nuclear ribonucleoprotein D0                           |
| 529 | Q14204 | Cytoplasmic dynein 1 heavy chain 1                                   |
| 530 | Q14315 | Filamin C                                                            |
| 531 | Q14666 | Radiated keratinocyte mRNA 266                                       |
| 532 | Q14914 | Prostaglandin reductase 1                                            |
| 533 | Q14917 | SPTAN1 protein                                                       |
| 534 | Q15008 | 26S proteasome non-ATPase regulatory subunit 6                       |

|     |        |                                                                          |
|-----|--------|--------------------------------------------------------------------------|
| 535 | Q15029 | 116 kDa U5 small nuclear ribonucleoprotein component                     |
| 536 | Q15056 | Eukaryotic translation initiation factor 4H                              |
| 537 | Q15374 | GARS protein                                                             |
| 538 | Q15393 | Splicing factor 3B subunit 3                                             |
| 539 | Q15717 | ELAV-like protein 1                                                      |
| 540 | Q16236 | Nuclear factor erythroid 2-related factor 2                              |
| 541 | Q16401 | 26S proteasome non-ATPase regulatory subunit 5                           |
| 542 | Q16444 | Phosphoglycerate kinase                                                  |
| 543 | Q16555 | Dihydropyrimidinase-related protein 2                                    |
| 544 | Q16658 | Fascin                                                                   |
| 545 | Q1AHP8 | Hepatopoietin PCn127                                                     |
| 546 | Q1KLZ0 | HCG15971                                                                 |
| 547 | Q1XBU6 | Aging-associated protein 14b                                             |
| 548 | Q2F838 | Eukaryotic translation elongation factor 1 gamma                         |
| 549 | Q2F839 | Heat shock 70 kDa protein 9B                                             |
| 550 | Q2NKY5 | TUBB6 protein                                                            |
| 551 | Q2TNB3 | Cell migration-inducing protein 22                                       |
| 552 | Q2TSD0 | Glyceraldehyde-3-phosphate dehydrogenase                                 |
| 553 | Q2TU84 | Aspartate aminotransferase                                               |
| 554 | Q2TUW9 | Lactoferrin                                                              |
| 555 | Q2VIN3 | RBM1                                                                     |
| 556 | Q2VIR3 | Putative eukaryotic translation initiation factor 2                      |
| 557 | Q2VPA0 | Lon protease                                                             |
| 558 | Q2VPJ6 | HSP90AA1 protein                                                         |
| 559 | Q2XPP3 | Type II 3 $\alpha$ -hydroxysteroid dehydrogenase                         |
| 560 | Q2YD88 | FAM129B protein                                                          |
| 561 | Q32Q12 | Nucleoside diphosphate kinase                                            |
| 562 | Q3B792 | NQO1 protein                                                             |
| 563 | Q3B7A3 | SEPT7 protein                                                            |
| 564 | Q3KNR6 | Hsc70-interacting protein                                                |
| 565 | Q3KQZ8 | EPRS protein                                                             |
| 566 | Q3MIH3 | Ubiquitin A-52                                                           |
| 567 | Q3ZCR3 | TUBB3 protein                                                            |
| 568 | Q49A90 | RPS27A protein                                                           |
| 569 | Q49AJ9 | RPL3 protein                                                             |
| 570 | Q49AK0 | LTA4H protein                                                            |
| 571 | Q49AN9 | SNRPG protein                                                            |
| 572 | Q4JM47 | AGR2                                                                     |
| 573 | Q4LE36 | ACLY variant protein                                                     |
| 574 | Q4LE58 | EIF4G1                                                                   |
| 575 | Q4LE60 | TNPO2 protein                                                            |
| 576 | Q4VB24 | Histone cluster 1                                                        |
| 577 | Q52NV4 | Histidyl-tRNA synthetase                                                 |
| 578 | Q53EM5 | Transketolase                                                            |
| 579 | Q53F35 | Acidic (Leucine-rich) nuclear phosphoprotein 32 family, member B variant |

|     |        |                                                       |
|-----|--------|-------------------------------------------------------|
| 580 | Q53F45 | Splicing factor, arginine/serine-rich 4               |
| 581 | Q53FB0 | Chloride intracellular channel protein                |
| 582 | Q53FG3 | Interleukin enhancer binding factor 2                 |
| 583 | Q53FN7 | BZW1 protein variant                                  |
| 584 | Q53FW2 | Phosphoribosyl pyrophosphate synthetase 1             |
| 585 | Q53G58 | Coronin                                               |
| 586 | Q53G71 | Calreticulin                                          |
| 587 | Q53G74 | Ribosomal protein L4                                  |
| 588 | Q53G81 | NAD(P)H menadione oxidoreductase 1                    |
| 589 | Q53G83 | Ribosomal protein S3                                  |
| 590 | Q53G92 | Tubulin, beta 4                                       |
| 591 | Q53GA7 | Tubulin alpha 6                                       |
| 592 | Q53GL5 | Isocitrate dehydrogenase 2                            |
| 593 | Q53GN4 | WD repeat domain 1                                    |
| 594 | Q53GN6 | Proteasome 26S non-ATPase subunit                     |
| 595 | Q53GX7 | Threonyl-tRNA synthetase v                            |
| 596 | Q53GZ6 | Heat shock 70kDa protein 8                            |
| 597 | Q53H17 | WD repeat-containing protein 1                        |
| 598 | Q53H34 | Ribosomal protein L13                                 |
| 599 | Q53HA4 | Seryl-tRNA synthetase                                 |
| 600 | Q53HE7 | Small nuclear ribonucleoprotein polypeptide N         |
| 601 | Q53HR2 | Acyl-Coenzyme A dehydrogenase                         |
| 602 | Q53HS0 | GlutaminyI-tRNA synthetase                            |
| 603 | Q53HU0 | Chaperonin containing TCP1, subunit 8 (Theta) variant |
| 604 | Q53HV2 | Chaperonin containing TCP1, subunit 7                 |
| 605 | Q53SS8 | Epididymis secretory protein Li 85                    |
| 606 | Q53XL8 | Proteasome 26S subunit                                |
| 607 | Q53Y51 | D-dopachrome tautomerase                              |
| 608 | Q569J8 | HNRPC protein                                         |
| 609 | Q58F26 | DHX9 protein                                          |
| 610 | Q58FF2 | Heat shock protein 94c                                |
| 611 | Q58FF3 | Putative endoplasmic-like protein                     |
| 612 | Q58FF9 | Heat shock protein 90Af                               |
| 613 | Q59EF6 | Calpain 2                                             |
| 614 | Q59EJ0 | Aldehyde dehydrogenase 1A1                            |
| 615 | Q59EJ3 | Heat shock 70kDa protein 1A                           |
| 616 | Q59EJ5 | Glutathione S-transferase M3                          |
| 617 | Q59EM6 | Internexin neuronal intermediate filament protein     |
| 618 | Q59ET0 | Glucan , branching enzyme 1 variant                   |
| 619 | Q59ET3 | Chaperonin containing TCP1, subunit 6A                |
| 620 | Q59EY4 | CDC10 protein variant                                 |
| 621 | Q59F66 | DEAD box polypeptide 17 isoform p82                   |
| 622 | Q59F68 | CD68 antigen                                          |
| 623 | Q59F85 | Glucose phosphate isomerase                           |
| 624 | Q59FF0 | EBNA-2 co-activator                                   |

|     |        |                                                                  |
|-----|--------|------------------------------------------------------------------|
| 625 | Q59FH0 | H2A histone family, member Y                                     |
| 626 | Q59FI9 | Ribosomal protein L12                                            |
| 627 | Q59FV6 | ARP3 actin-related protein 3                                     |
| 628 | Q59G24 | Activated RNA polymerase II transcription cofactor 4 variant     |
| 629 | Q59G78 | Lactate dehydrogenase B                                          |
| 630 | Q59GB4 | Dihydropyrimidinase-like 2                                       |
| 631 | Q59GE4 | Ribosomal protein S10                                            |
| 632 | Q59GF8 | Heat shock 70kDa protein 4                                       |
| 633 | Q59GK9 | Ribosomal protein L21                                            |
| 634 | Q59GL1 | Synaptotagmin binding, cytoplasmic RNA interacting protein       |
| 635 | Q59GP7 | Interleukin enhancer binding factor 3                            |
| 636 | Q59GR8 | TPM1 protein                                                     |
| 637 | Q59GX6 | DEAD/H (Asp-Glu-Ala-Asp/His) box polypeptide 3                   |
| 638 | Q59GY3 | Arginine/serine-rich splicing factor 6 variant                   |
| 639 | Q59HA3 | IQ motif containing GTPase activating protein 2                  |
| 640 | Q59HH3 | Phosphoribosylglycinamide formyltransferase                      |
| 641 | Q5CAQ4 | TNF receptor-associated protein 1                                |
| 642 | Q5H928 | 3-hydroxyacyl-CoA dehydrogenase type-2                           |
| 643 | Q5HYB6 | Epididymis luminal protein 189                                   |
| 644 | Q5JNZ5 | Putative 40S ribosomal protein                                   |
| 645 | Q5JR95 | 40S ribosomal protein S8                                         |
| 646 | Q5JRR6 | Ubiquitin-like modifier-activating enzyme 1                      |
| 647 | Q5M7Z9 | TARS protein                                                     |
| 648 | Q5QTS3 | FWP004                                                           |
| 649 | Q5R211 | Carbamoyl-phosphate synthase                                     |
| 650 | Q5RLN2 | Desmin                                                           |
| 651 | Q5SU16 | Beta 5-tubulin                                                   |
| 652 | Q5SYQ9 | Retinal dehydrogenase 1                                          |
| 653 | Q5T3N1 | Annexin                                                          |
| 654 | Q5T5C7 | Serine--tRNA ligase, cytoplasmic                                 |
| 655 | Q5T7N0 | 60S ribosomal protein L5                                         |
| 656 | Q5T8F0 | Cathepsin L1                                                     |
| 657 | Q5T8U2 | 60S ribosomal protein L7a                                        |
| 658 | Q5TA02 | Glutathione S-transferase omega-1                                |
| 659 | Q5TB19 | Acidic (Leucine-rich) nuclear phosphoprotein 32 family, member E |
| 660 | Q5TB52 | 3'-phosphoadenosine 5'-phosphosulfate synthase 2                 |
| 661 | Q5TCD1 | Isoleucine--tRNA ligase, cytoplasmic                             |
| 662 | Q5TCI8 | Prelamin-A/C                                                     |
| 663 | Q5TEC6 | Histone H3                                                       |
| 664 | Q5VTE0 | Putative elongation factor 1-alpha-like 3                        |
| 665 | Q5VU62 | TPM3 protein                                                     |
| 666 | Q60FE5 | Filamin A                                                        |
| 667 | Q65ZQ3 | FBRNP                                                            |
| 668 | Q66K91 | Small nuclear ribonucleoprotein-associated protein               |
| 669 | Q6DN03 | Putative histone H2B                                             |

|     |        |                                            |
|-----|--------|--------------------------------------------|
| 670 | Q6FHK8 | PGAM1 protein                              |
| 671 | Q6FHP5 | PHB protein                                |
| 672 | Q6FHU2 | Epididymis secretory protein Li 35         |
| 673 | Q6FHV6 | ENO2 protein                               |
| 674 | Q6FI35 | Proliferating cell nuclear antigen         |
| 675 | Q6I9Y8 | IPO4 protein                               |
| 676 | Q6IAX2 | RPL21 protein                              |
| 677 | Q6IBA2 | PC4 protein                                |
| 678 | Q6IBG5 | MYL6 protein                               |
| 679 | Q6IBH6 | RPL26 protein                              |
| 680 | Q6IBM8 | U5-116KD protein                           |
| 681 | Q6IBN0 | PSMD3 protein                              |
| 682 | Q6IBN1 | HNRPK protein                              |
| 683 | Q6IBR2 | FARSLA protein                             |
| 684 | Q6IBS5 | DLST protein                               |
| 685 | Q6IBT3 | CCT7 protein                               |
| 686 | Q6IBU0 | EIF5 protein                               |
| 687 | Q6IC76 | G22P1 protein                              |
| 688 | Q6IN67 | HYOU1 protein                              |
| 689 | Q6IPF2 | Heterogeneous nuclear ribonucleoprotein A1 |
| 690 | Q6IPH7 | RPL14 protein                              |
| 691 | Q6LBS1 | SmB /B' autoimmune antigene                |
| 692 | Q6LC01 | MRNA encoding beta-tubulin                 |
| 693 | Q6LET3 | HPRT1 protein                              |
| 694 | Q6NSF2 | RPLP0 protein                              |
| 695 | Q6NVY0 | Calcyclin binding protein                  |
| 696 | Q6NWZ1 | CKAP4 protein                              |
| 697 | Q6P1L4 | PYGL protein                               |
| 698 | Q6P1N4 | IQGAP1 protein                             |
| 699 | Q6P2H7 | DYNC1H1 protein                            |
| 700 | Q6P2Q9 | Pre-mRNA-processing-splicing factor 8      |
| 701 | Q6P4B4 | PFAS protein                               |
| 702 | Q6P4C9 | EEF1A1 protein                             |
| 703 | Q6PCE3 | Glucose 1,6-bisphosphate synthase          |
| 704 | Q6PEY2 | Tubulin alpha-3E                           |
| 705 | Q6PIN5 | PA2G4 protein                              |
| 706 | Q6PIX2 | SFPQ protein                               |
| 707 | Q6PJ43 | ACTG1 protein                              |
| 708 | Q6PJJ3 | FASN protein                               |
| 709 | Q6PJT4 | MSN protein                                |
| 710 | Q6PJY1 | FUBP1 protein                              |
| 711 | Q6PK50 | HSP90AB1 protein                           |
| 712 | Q6PKA6 | ALDH3A1 protein                            |
| 713 | Q6PUJ7 | Epididymis luminal protein 215             |
| 714 | Q6QE17 | IMP dehydrogenase 2                        |



|     |        |                                                                    |
|-----|--------|--------------------------------------------------------------------|
| 715 | Q6QMJ5 | Tubulin alpha 1                                                    |
| 716 | Q6S8J3 | POTE ankyrin domain family member E                                |
| 717 | Q6ZNL4 | FLJ00279 protein                                                   |
| 718 | Q71RH4 | FP1047                                                             |
| 719 | Q75MH1 | HCG1745083                                                         |
| 720 | Q76LA1 | CSTB protein                                                       |
| 721 | Q7KYM9 | ORF protein                                                        |
| 722 | Q7KZF4 | Staphylococcal nuclease domain-containing protein 1                |
| 723 | Q7KZX8 | G1 to S phase transition 1                                         |
| 724 | Q7L4K8 | IARS protein                                                       |
| 725 | Q7L4M3 | KRT8 protein                                                       |
| 726 | Q7Z3X3 | N-acetylglucosamine-6-sulfatase                                    |
| 727 | Q7Z474 | Proteasome subunit beta                                            |
| 728 | Q7Z4Y3 | Arsenite-resistance protein ARS2                                   |
| 729 | Q7Z726 | Importin                                                           |
| 730 | Q7Z759 | CCT8 protein                                                       |
| 731 | Q86UY0 | TXNDC5 protein                                                     |
| 732 | Q86VG2 | Splicing factor proline/glutamine-rich                             |
| 733 | Q86WD0 | Eukaryotic translation initiation factor 4A isoform 2-like protein |
| 734 | Q86XU5 | MYH9 protein                                                       |
| 735 | Q8IUB0 | CTCL tumor antigen HD-CL-08                                        |
| 736 | Q8IZ29 | Tubulin, beta 2C                                                   |
| 737 | Q8J015 | 60S ribosomal protein L13a                                         |
| 738 | Q8N163 | Cell cycle/apoptosis regulator protein 2                           |
| 739 | Q8N1C8 | HSPA9 protein                                                      |
| 740 | Q8N532 | TUBA1C protein                                                     |
| 741 | Q8N5M8 | PHGDH protein                                                      |
| 742 | Q8NBS9 | Thioredoxin domain-containing protein 5                            |
| 743 | Q8NBX0 | Saccharopine dehydrogenase-like oxidoreductase                     |
| 744 | Q8NCW5 | NAD(P)H-hydrate epimerase                                          |
| 745 | Q8TCG4 | TPMsk1                                                             |
| 746 | Q8TD11 | Decay-accelerating factor 4ab                                      |
| 747 | Q8TD12 | Decay-accelerating factor 3                                        |
| 748 | Q8TD13 | Decay-accelerating factor 1 ab                                     |
| 749 | Q8TD47 | 40S ribosomal protein S4, Y isoform                                |
| 750 | Q8TES4 | FLJ00119 protein                                                   |
| 751 | Q8VDP4 | Cell cycle and apoptosis regulator protein 1                       |
| 752 | Q8WUI6 | COPG protein                                                       |
| 753 | Q8WVX7 | Ribosomal protein S19                                              |
| 754 | Q8WYN9 | Ribosomal protein S27                                              |
| 755 | Q92688 | Acidic leucine-rich nuclear phosphoprotein 32 family member B      |
| 756 | Q96AY3 | Peptidyl-prolyl cis-trans isomerase                                |
| 757 | Q96B07 | EIF4A2 protein                                                     |
| 758 | Q96BA7 | HNRPU protein                                                      |
| 759 | Q96BG6 | ACTN4 protein                                                      |

|     |        |                                                 |
|-----|--------|-------------------------------------------------|
| 760 | Q96BS4 | FBL protein                                     |
| 761 | Q96C19 | EF-hand domain-containing protein D2            |
| 762 | Q96C32 | Polyubiquitin-C                                 |
| 763 | Q96C61 | FLNA protein                                    |
| 764 | Q96DG6 | Carboxymethylenebutenolidase                    |
| 765 | Q96E39 | RNA binding motif protein, X-linked-like-1      |
| 766 | Q96G03 | Phosphoglucomutase-2                            |
| 767 | Q96H31 | UBC protein                                     |
| 768 | Q96HE7 | ERO1-like protein                               |
| 769 | Q96HX0 | TUBB2C protein                                  |
| 770 | Q96IR1 | RPS4X protein                                   |
| 771 | Q96IS6 | HSPA8 protein                                   |
| 772 | Q96KP4 | Cytosolic non-specific dipeptidase              |
| 773 | Q96QL0 | Ribosomal protein L3                            |
| 774 | Q96RE1 | Translation elongation factor 1 alpha 1-like 14 |
| 775 | Q99832 | T-complex protein 1 subunit eta                 |
| 776 | Q9BQ02 | NCL protein                                     |
| 777 | Q9BR63 | FARSB protein                                   |
| 778 | Q9BS14 | GANAB protein                                   |
| 779 | Q9BS26 | Endoplasmic reticulum resident protein 44       |
| 780 | Q9BTI9 | NPM1 protein                                    |
| 781 | Q9BUF5 | Tubulin beta-6                                  |
| 782 | Q9BUV4 | RPL5 protein                                    |
| 783 | Q9BUZ3 | QARS protein                                    |
| 784 | Q9BV61 | TRAP1 protein                                   |
| 785 | Q9BVA1 | Tubulin beta-2B                                 |
| 786 | Q9BXP5 | Serrate RNA effector molecule homolog           |
| 787 | Q9BYN0 | Sulfiredoxin-1                                  |
| 788 | Q9BZ93 | Prosomal P27K protein                           |
| 789 | Q9H2U2 | Inorganic pyrophosphatase 2, mitochondrial      |
| 790 | Q9H369 | PRO1633                                         |
| 791 | Q9H3A5 | PRO2195                                         |
| 792 | Q9H7K8 | FLJ00064 protein                                |
| 793 | Q9HAP0 | Valosin-containing protein                      |
| 794 | Q9HC38 | Glyoxalase domain-containing protein 1          |
| 795 | Q9NR30 | Nucleolar RNA helicase 2                        |
| 796 | Q9NR45 | Sialic acid synthase                            |
| 797 | Q9NYD7 | High mobility group 1 protein                   |
| 798 | Q9NYF8 | Bcl-2-associated transcription factor 1         |
| 799 | Q9NZ23 | Drug-sensitive protein 1                        |
| 800 | Q9NZE6 | BM-010                                          |
| 801 | Q9NZM1 | Myoferlin                                       |
| 802 | Q9P0M6 | Core histone macro-H2A.2                        |
| 803 | Q9P1G4 | PRO1837                                         |
| 804 | Q9P1N9 | PRO0785                                         |

|     |        |                                                                |
|-----|--------|----------------------------------------------------------------|
| 805 | Q9P2J5 | Leucine--tRNA ligase, cytoplasmic                              |
| 806 | Q9UIR2 | ATP sulfurylase/APS kinase isoform SK2                         |
| 807 | Q9UKK9 | ADP-sugar pyrophosphatase                                      |
| 808 | Q9UMY3 | 3-phosphoglycerate dehydrogenase                               |
| 809 | Q9UN47 | Frameshifted pyruvate kinase M2                                |
| 810 | Q9UNM1 | Chaperonin 10-related protein                                  |
| 811 | Q9UNM7 | 26S proteasome subunit p40.5                                   |
| 812 | Q9UNN8 | Endothelial protein C                                          |
| 813 | Q9UQC1 | Heat shock protein 72                                          |
| 814 | Q9UQM3 | Alpha-tubulin                                                  |
| 815 | Q9Y230 | RuvB-like 2                                                    |
| 816 | Q9Y265 | RuvB-like 1                                                    |
| 817 | Q9Y2B0 | Protein canopy homolog 2                                       |
| 818 | Q9Y376 | Calcium-binding protein 39                                     |
| 819 | Q9Y3E8 | CGI-150 protein                                                |
| 820 | Q9Y678 | Coatomer subunit gamma-1                                       |
| 821 | Q9Y6E3 | HSPC027                                                        |
| 822 | R4GMR5 | 26S proteasome non-ATPase regulatory subunit 8                 |
| 823 | R4GN08 | Actin-related protein 2/3 complex subunit 4                    |
| 824 | R4SBI6 | EPHX1                                                          |
| 825 | S4R3N1 | Protein HSPE1-MOB4                                             |
| 826 | U3KQ84 | Dolichyl-diphosphooligosaccharide--protein glycosyltransferase |
| 827 | V9GYZ6 | Bifunctional glutamate/proline--tRNA ligase                    |
| 828 | V9GZ37 | Heat shock 70 kDa protein 1A                                   |
| 829 | V9HVX6 | Epididymis luminal protein 9                                   |
| 830 | V9HVZ0 | Epididymis secretory protein Li 91                             |
| 831 | V9HVZ7 | Epididymis luminal protein 176                                 |
| 832 | V9HW22 | Epididymis luminal protein 33                                  |
| 833 | V9HW24 | Epididymis secretory protein Li 73                             |
| 834 | V9HW25 | Epididymis secretory protein Li 273                            |
| 835 | V9HW26 | ATP synthase subunit alpha                                     |
| 836 | V9HW31 | ATP synthase subunit beta                                      |
| 837 | V9HW35 | Epididymis secretory protein Li 55                             |
| 838 | V9HW37 | Epididymis secretory protein Li 69                             |
| 839 | V9HW38 | Epididymis secretory protein Li 106                            |
| 840 | V9HW41 | Epididymis secretory protein Li 71                             |
| 841 | V9HW42 | Epididymis secretory protein Li 105                            |
| 842 | V9HW44 | Epididymis secretory protein Li 303                            |
| 843 | V9HW55 | Epididymis secretory protein Li 275                            |
| 844 | V9HW69 | Epididymis secretory protein Li 66                             |
| 845 | V9HW77 | Epididymis luminal protein 211                                 |
| 846 | V9HW79 | D-3-phosphoglycerate dehydrogenase                             |
| 847 | V9HW80 | Epididymis luminal protein 220                                 |
| 848 | V9HW90 | Epididymis luminal protein 75                                  |
| 849 | V9HWB8 | Pyruvate kinase                                                |

|     |        |                                    |
|-----|--------|------------------------------------|
| 850 | V9HWC9 | Superoxide dismutase [Cu-Zn]       |
| 851 | V9HWD6 | Epididymis secretory protein Li 1  |
| 852 | V9HWE1 | Epididymis luminal protein 113     |
| 853 | V9HWE9 | Epididymis secretory protein Li 22 |
| 854 | V9HWG9 | Epididymis secretory protein Li 21 |
| 855 | V9HWH1 | Epididymis luminal protein 57      |
| 856 | V9HWH2 | Creatine kinase brain isoform 1    |
| 857 | V9HWH9 | Protein S100                       |
| 858 | V9HWI4 | Epididymis luminal protein 110     |
| 859 | V9HWK1 | Triosephosphate isomerase          |
| 860 | V9HWK2 | Epididymis luminal protein 114     |
| 861 | V9HWK4 | Epididymis luminal protein 162     |
| 862 | X6RA14 | S-formylglutathione hydrolase      |
